# Supplementary material for: Development of cost-effective and long-lasting integrated technology for H2S control from sludge in wastewater treatment plants
Source: Royal Society of Chemistry journal article supplement (doi:10.1039/d2ew00496h), 2022-11-28
Supplement: d2ew00496h1.pdf [file d2ew00496h1.pdf]

## Supporting Information

### **Development of cost-effective and long-lasting integrated technology for H<sub>2</sub>S control from sludge in wastewater treatment plants**

Tianwei Hao<sup>a</sup>, Jiajia Zeng<sup>b</sup>, Jianyu Pan<sup>b</sup>, Wenzhuo Huang<sup>b</sup>, Zhe Kong<sup>c</sup>, Jianliang Sun<sup>b,\*</sup>

a. Department of Civil and Environmental Engineering, Faculty of Science and Technology, University of Macau, Macau 999078, China

b. Guangdong Provincial Key Laboratory of Chemical Pollution and Environmental Safety & MOE Key Laboratory of Theoretical Chemistry of Environment, School of Environment, South China Normal University, Guangzhou 510006, China

c. School of Environmental Science and Engineering, Suzhou University of Science and Technology, Suzhou 215009, China

\*Corresponding author:

Dr. Jianliang Sun. Tel: (86)13533626596; e-mail: [sunjl986@hotmail.com](mailto:sunj1986@hotmail.com)

## **Table of supporting information**

**Fig. S1.** The schematic representation of the batch reactor setup for studying the H<sub>2</sub>S control in the liquid sludge by chemical dosing.

**Fig. S2.** The schematic representation of the batch reactor setup for studying the H<sub>2</sub>S control in the liquid sludge by aeration.

**Table S1.** The properties of the liquid sludge samples collected from a conventional municipal WWTP in Hong Kong.

**Table S2.** The prices and purities of the chemicals used in the cost estimations.

**Table S3.** The optimal parameters for the integrated approaches to achieve the desired H<sub>2</sub>S control performance.

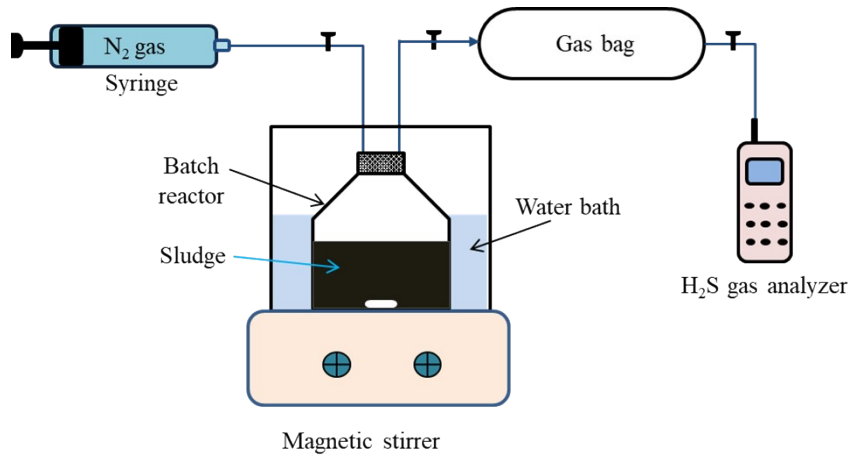

**Fig. S1.** The schematic representation of the batch reactor setup for studying the H<sub>2</sub>S control in the liquid sludge by chemical dosing.

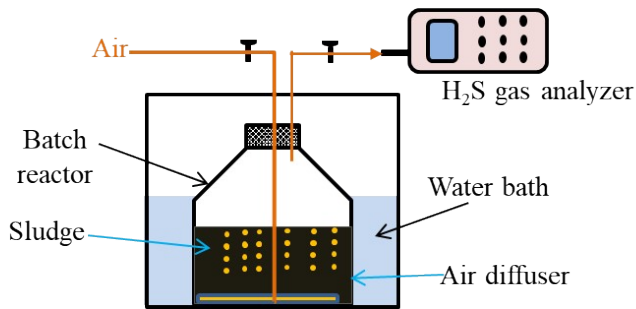

**Fig. S2.** The schematic representation of the batch reactor setup for studying the H<sub>2</sub>S control in the liquid sludge by aeration.

**Table S1.** The properties of the liquid sludge samples collected from a conventional municipal WWTP in Hong Kong.

| Parameter                                      | Value         |
|------------------------------------------------|---------------|
| Total suspended solids (g L <sup>-1</sup> )    | 20.2–39.80    |
| Volatile suspended solids (g L <sup>-1</sup> ) | 17.20–34.20   |
| pH                                             | 5.30–6.30     |
| Oxidation-reduction potential (mV)             | -173.6–294.00 |
| Dissolved hydrogen sulfide (mg S per L)        | 21.50–74.30   |
| Sulfate (mg S per L)                           | 112.97–293.40 |

**Table S2.** The prices and purities of the chemicals used in the cost estimations.

| Chemical                      | Commercial products                         | Price (USD per tonne) <sup>a</sup> |
|-------------------------------|---------------------------------------------|------------------------------------|
| NaClO <sub>2</sub>            | 85 wt% NaClO <sub>2</sub> solid             | 2500                               |
| H <sub>2</sub> O <sub>2</sub> | 33% H <sub>2</sub> O <sub>2</sub> solution  | 350                                |
| Iron oxide                    | 98 wt% Fe <sub>2</sub> O <sub>3</sub> solid | 580                                |
| Glutaraldehyde                | 50 wt% glutaraldehyde solution              | 2000                               |

<sup>a</sup> Prices were based on Alibaba International Prices in 2022

(<https://www.alibaba.com>).

**Table S3.** The optimal parameters for the integrated approaches to achieve the desired H<sub>2</sub>S control performance.

| Approach                                                      | Optimal parameters                                                                                                                  |
|---------------------------------------------------------------|-------------------------------------------------------------------------------------------------------------------------------------|
| H <sub>2</sub> O <sub>2</sub> -glutaraldehyde                 | 400 mg L <sup>-1</sup> H <sub>2</sub> O <sub>2</sub> + 1 mM glutaraldehyde                                                          |
| NaClO <sub>2</sub> -glutaraldehyde                            | 400 mg L <sup>-1</sup> NaClO <sub>2</sub> + 1 mM glutaraldehyde                                                                     |
| Aeration-H <sub>2</sub> O <sub>2</sub>                        | 30 min at a flowrate of 17.8 m <sup>3</sup> air per h m <sup>-3</sup> sludge + 250 mg L <sup>-1</sup> H <sub>2</sub> O <sub>2</sub> |
| Aeration-NaClO <sub>2</sub>                                   | 30 min at a flowrate of 17.8 m <sup>3</sup> air per h m <sup>-3</sup> sludge + 400 mg L <sup>-1</sup> H <sub>2</sub> O <sub>2</sub> |
| H <sub>2</sub> O <sub>2</sub> -Fe <sub>2</sub> O <sub>3</sub> | 400 mg L <sup>-1</sup> H <sub>2</sub> O <sub>2</sub> + 20000 mg L <sup>-1</sup> Fe <sub>2</sub> O <sub>3</sub>                      |
| NaClO <sub>2</sub> -Fe <sub>2</sub> O <sub>3</sub>            | 400 mg L <sup>-1</sup> NaClO <sub>2</sub> + 20000 mg L <sup>-1</sup> Fe <sub>2</sub> O <sub>3</sub>                                 |
| H <sub>2</sub> O <sub>2</sub>                                 | 500 mg L <sup>-1</sup> <sup>b</sup>                                                                                                 |
| NaClO <sub>2</sub>                                            | 800 mg L <sup>-1</sup> <sup>b</sup>                                                                                                 |

<sup>b</sup> The optimal dosages of H<sub>2</sub>O<sub>2</sub> and NaClO<sub>2</sub> were based on the results of Yin et al. [1].

## References

- 1 R. Yin, J. Peng, J. Sun, C. Li, D. Xia, C. Shang, Simultaneous removal of hydrogen sulfide, phosphate and emerging organic contaminants, and improvement of sludge dewaterability by oxidant dosing in sulfide-iron-laden sludge, *Water Research*, 2021, **203**, 117557.
